# Supplementary material for: In situ studies on defect formation dynamics in flash-sintered TiO2
Source: Royal Society of Chemistry journal article supplement (doi:10.1039/d3nr02630b), 2023-01-01
Supplement: d3nr02630b3.pdf [file d3nr02630b3.pdf]

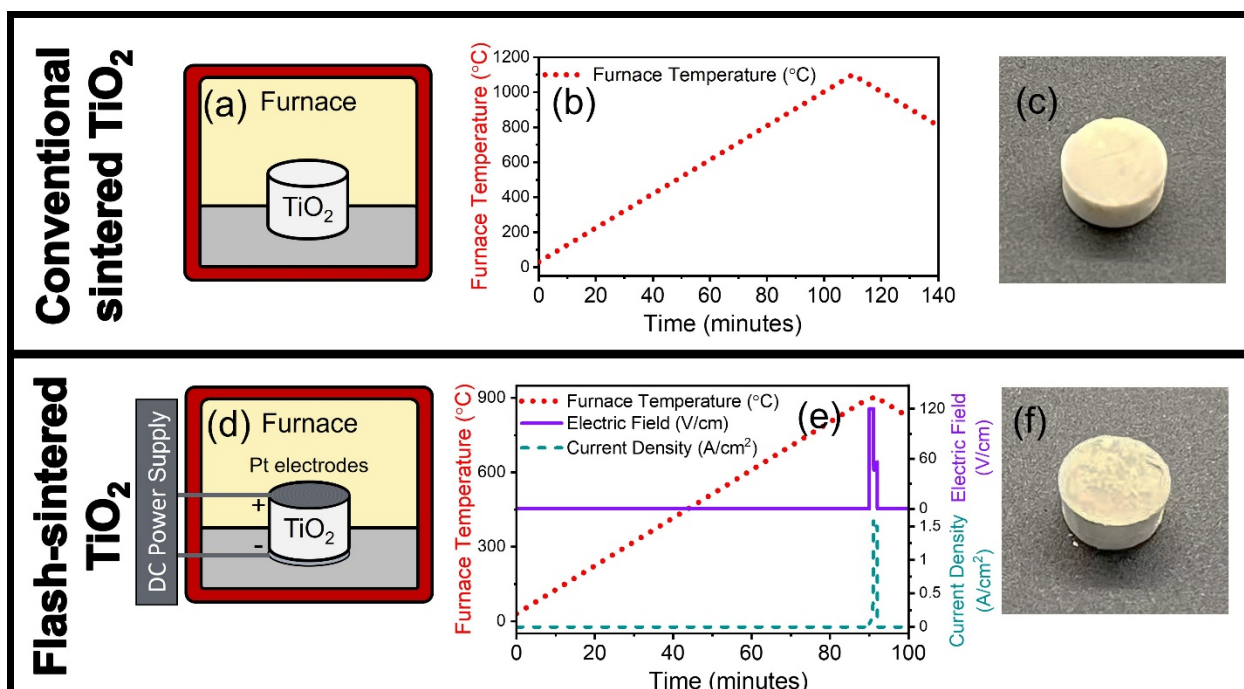

Figure S1. (a) Schematic of the experimental setup for conventional TiO<sub>2</sub> sintering. (b) The plot of temperature and time for the conventional sintering process. (c) The photo of conventional sintered TiO<sub>2</sub>. (d) Schematic showing the experimental setup for flash sintering. (e) The plot of temperature, electric field, and current density during flash sintering. (f) The photo of flash sintered TiO<sub>2</sub> sample.

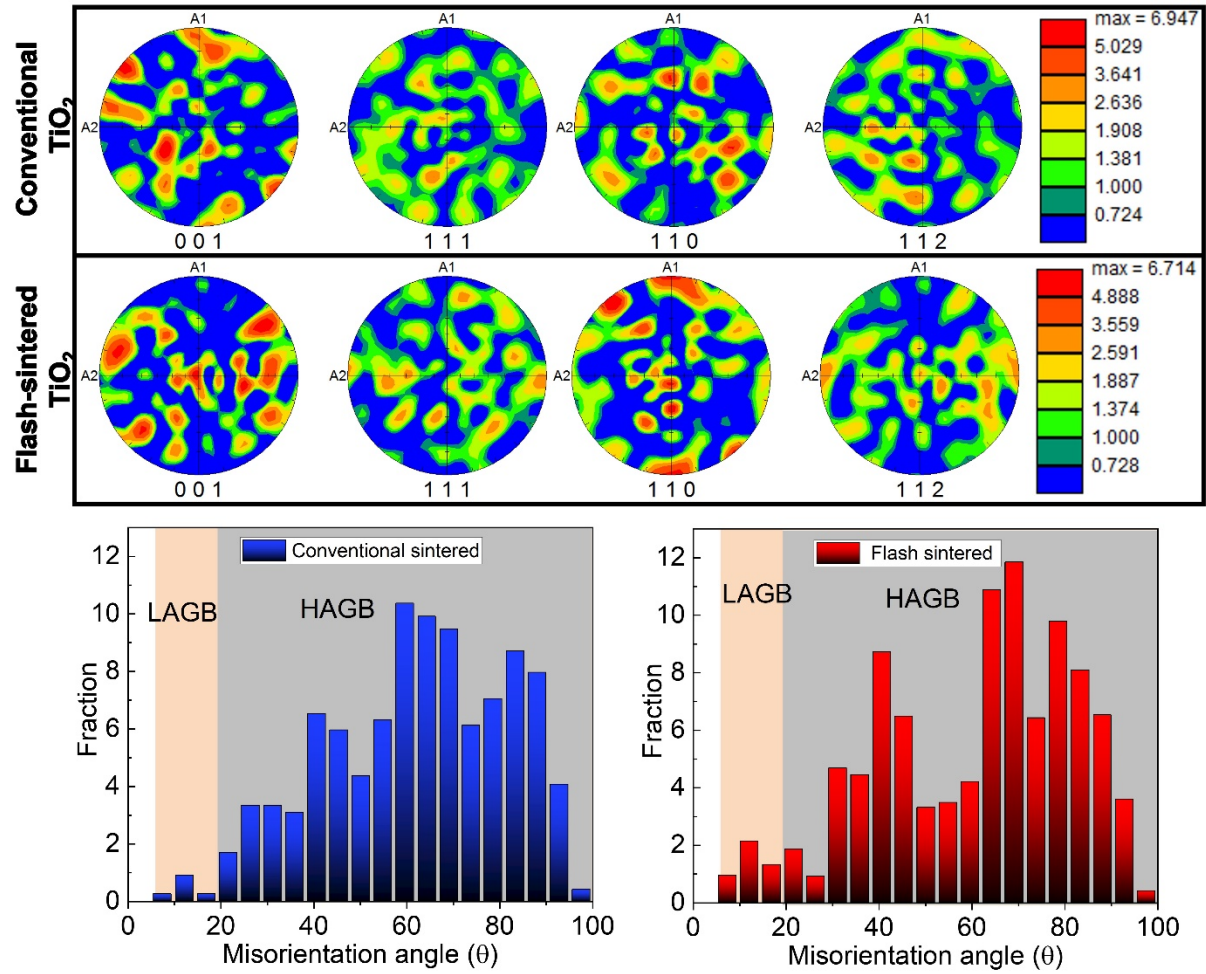

Figure S2. Texture and grain boundary distributions for the conventional and flash sintered  $\text{TiO}_2$  specimens.

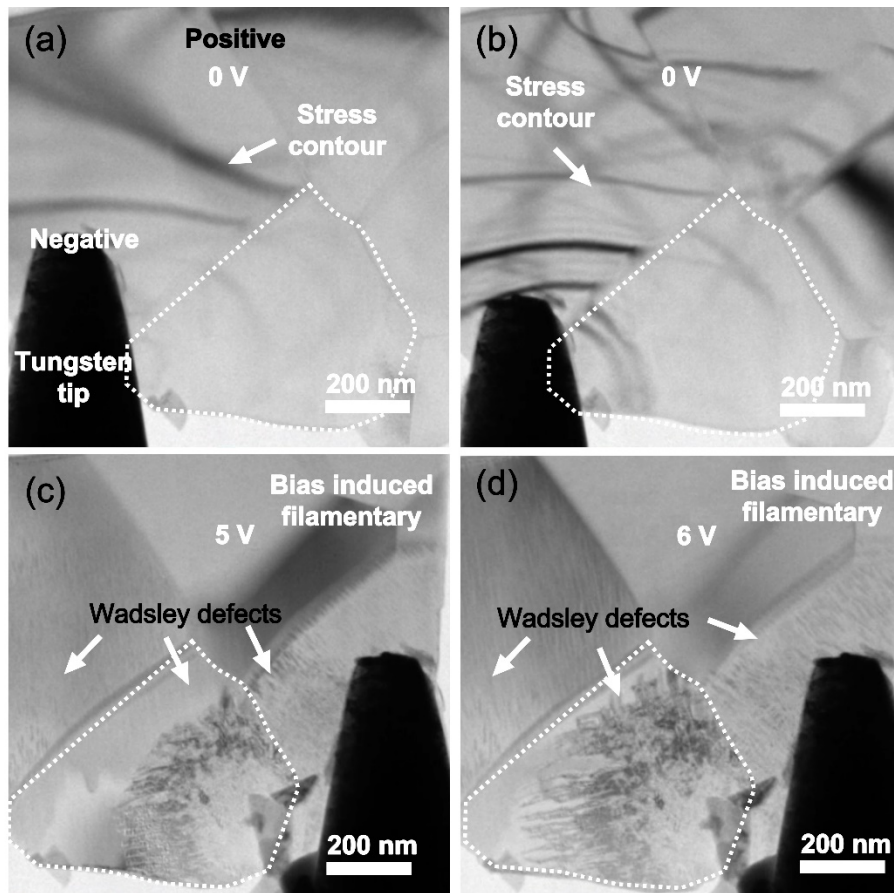

Figure S3. (a,b) TEM snapshots showing the stress contour migration triggered by movement of tip. (c,d) The defects propagation under electric bias.

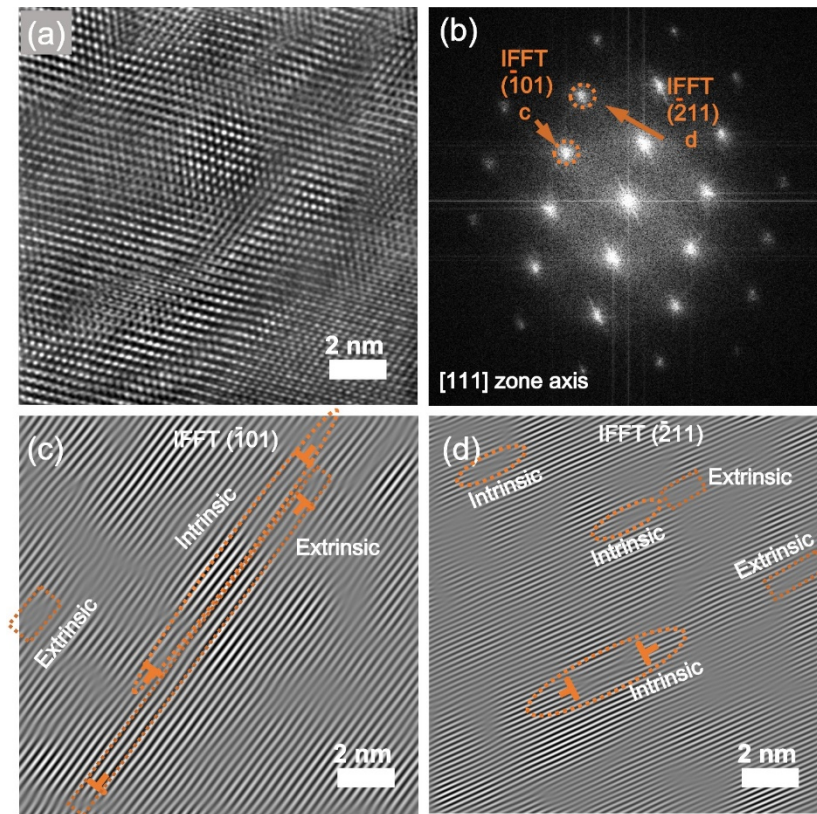

Figure S4. Postmortem HRTEM micrograph of the flash sintered TiO<sub>2</sub> sample showing the extrinsic and intrinsic nature of planar defects. (a) HRTEM micrograph of Wadsley defects formed under bias. (b) The FFT image of Fig. S3a. (c, d) IFFT images show the extrinsic and intrinsic planar defects along  $(\bar{1}01)$  and  $(\bar{2}11)$ .

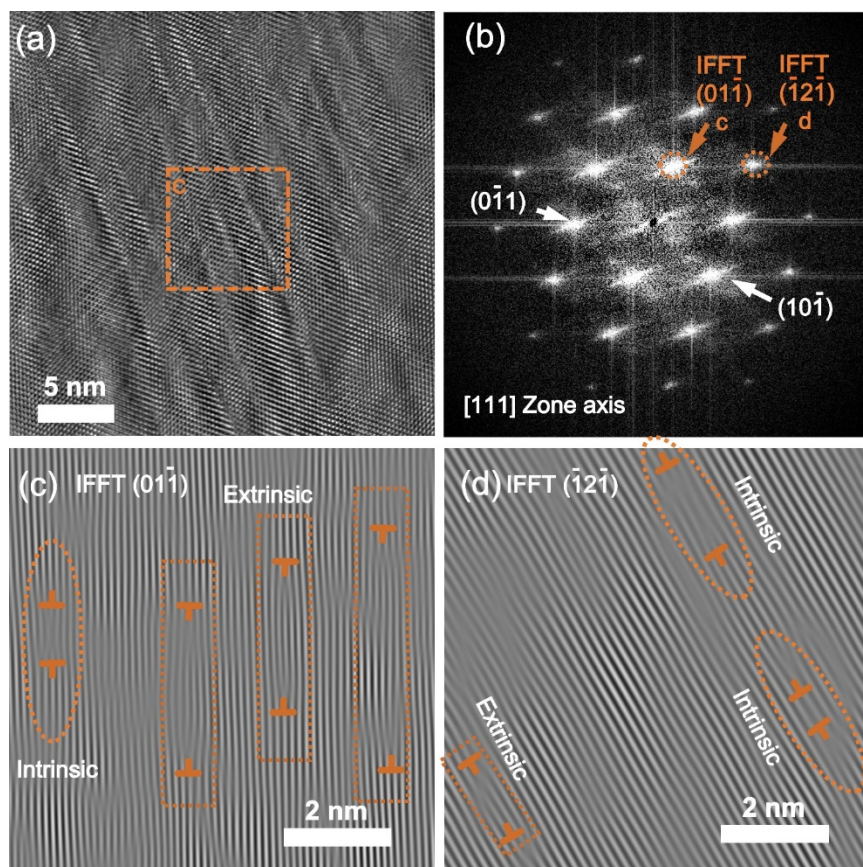

Figure S5. Postmortem HRTEM micrograph of the conventional sintered  $\text{TiO}_2$  sample showing the extrinsic and intrinsic nature of planar defects. (a) HRTEM micrograph of Wadsley defects formed under bias. (b) The FFT image of area c in Fig. S4a. (c, d) IFFT images show the extrinsic and intrinsic planar defects along (011) and ( $\bar{1}2\bar{1}$ ).

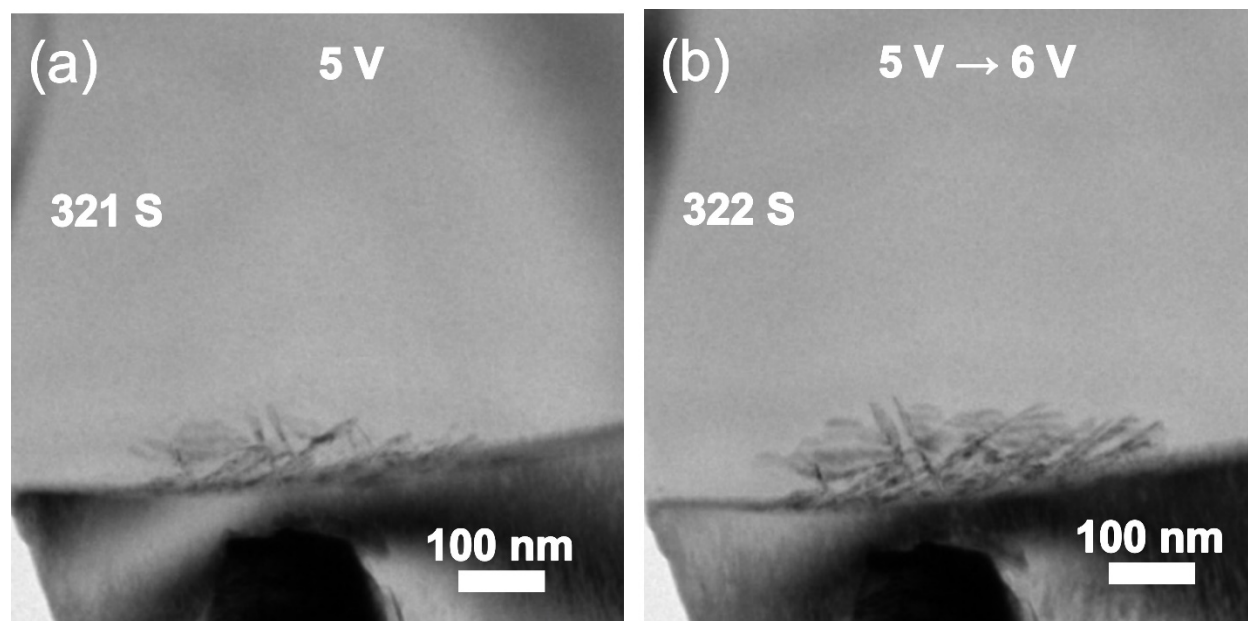

Figure S6. TEM snapshots showing the new filamentary event happened adjacent to previous filaments area when voltage increased from 5V to 6V.
